# Supplementary material
Source: PubMed Central journal article supplement (PMC8055448)
Supplement: NIHMS1569188-supplement-1.pdf [file NIHMS1569188-supplement-1.pdf]

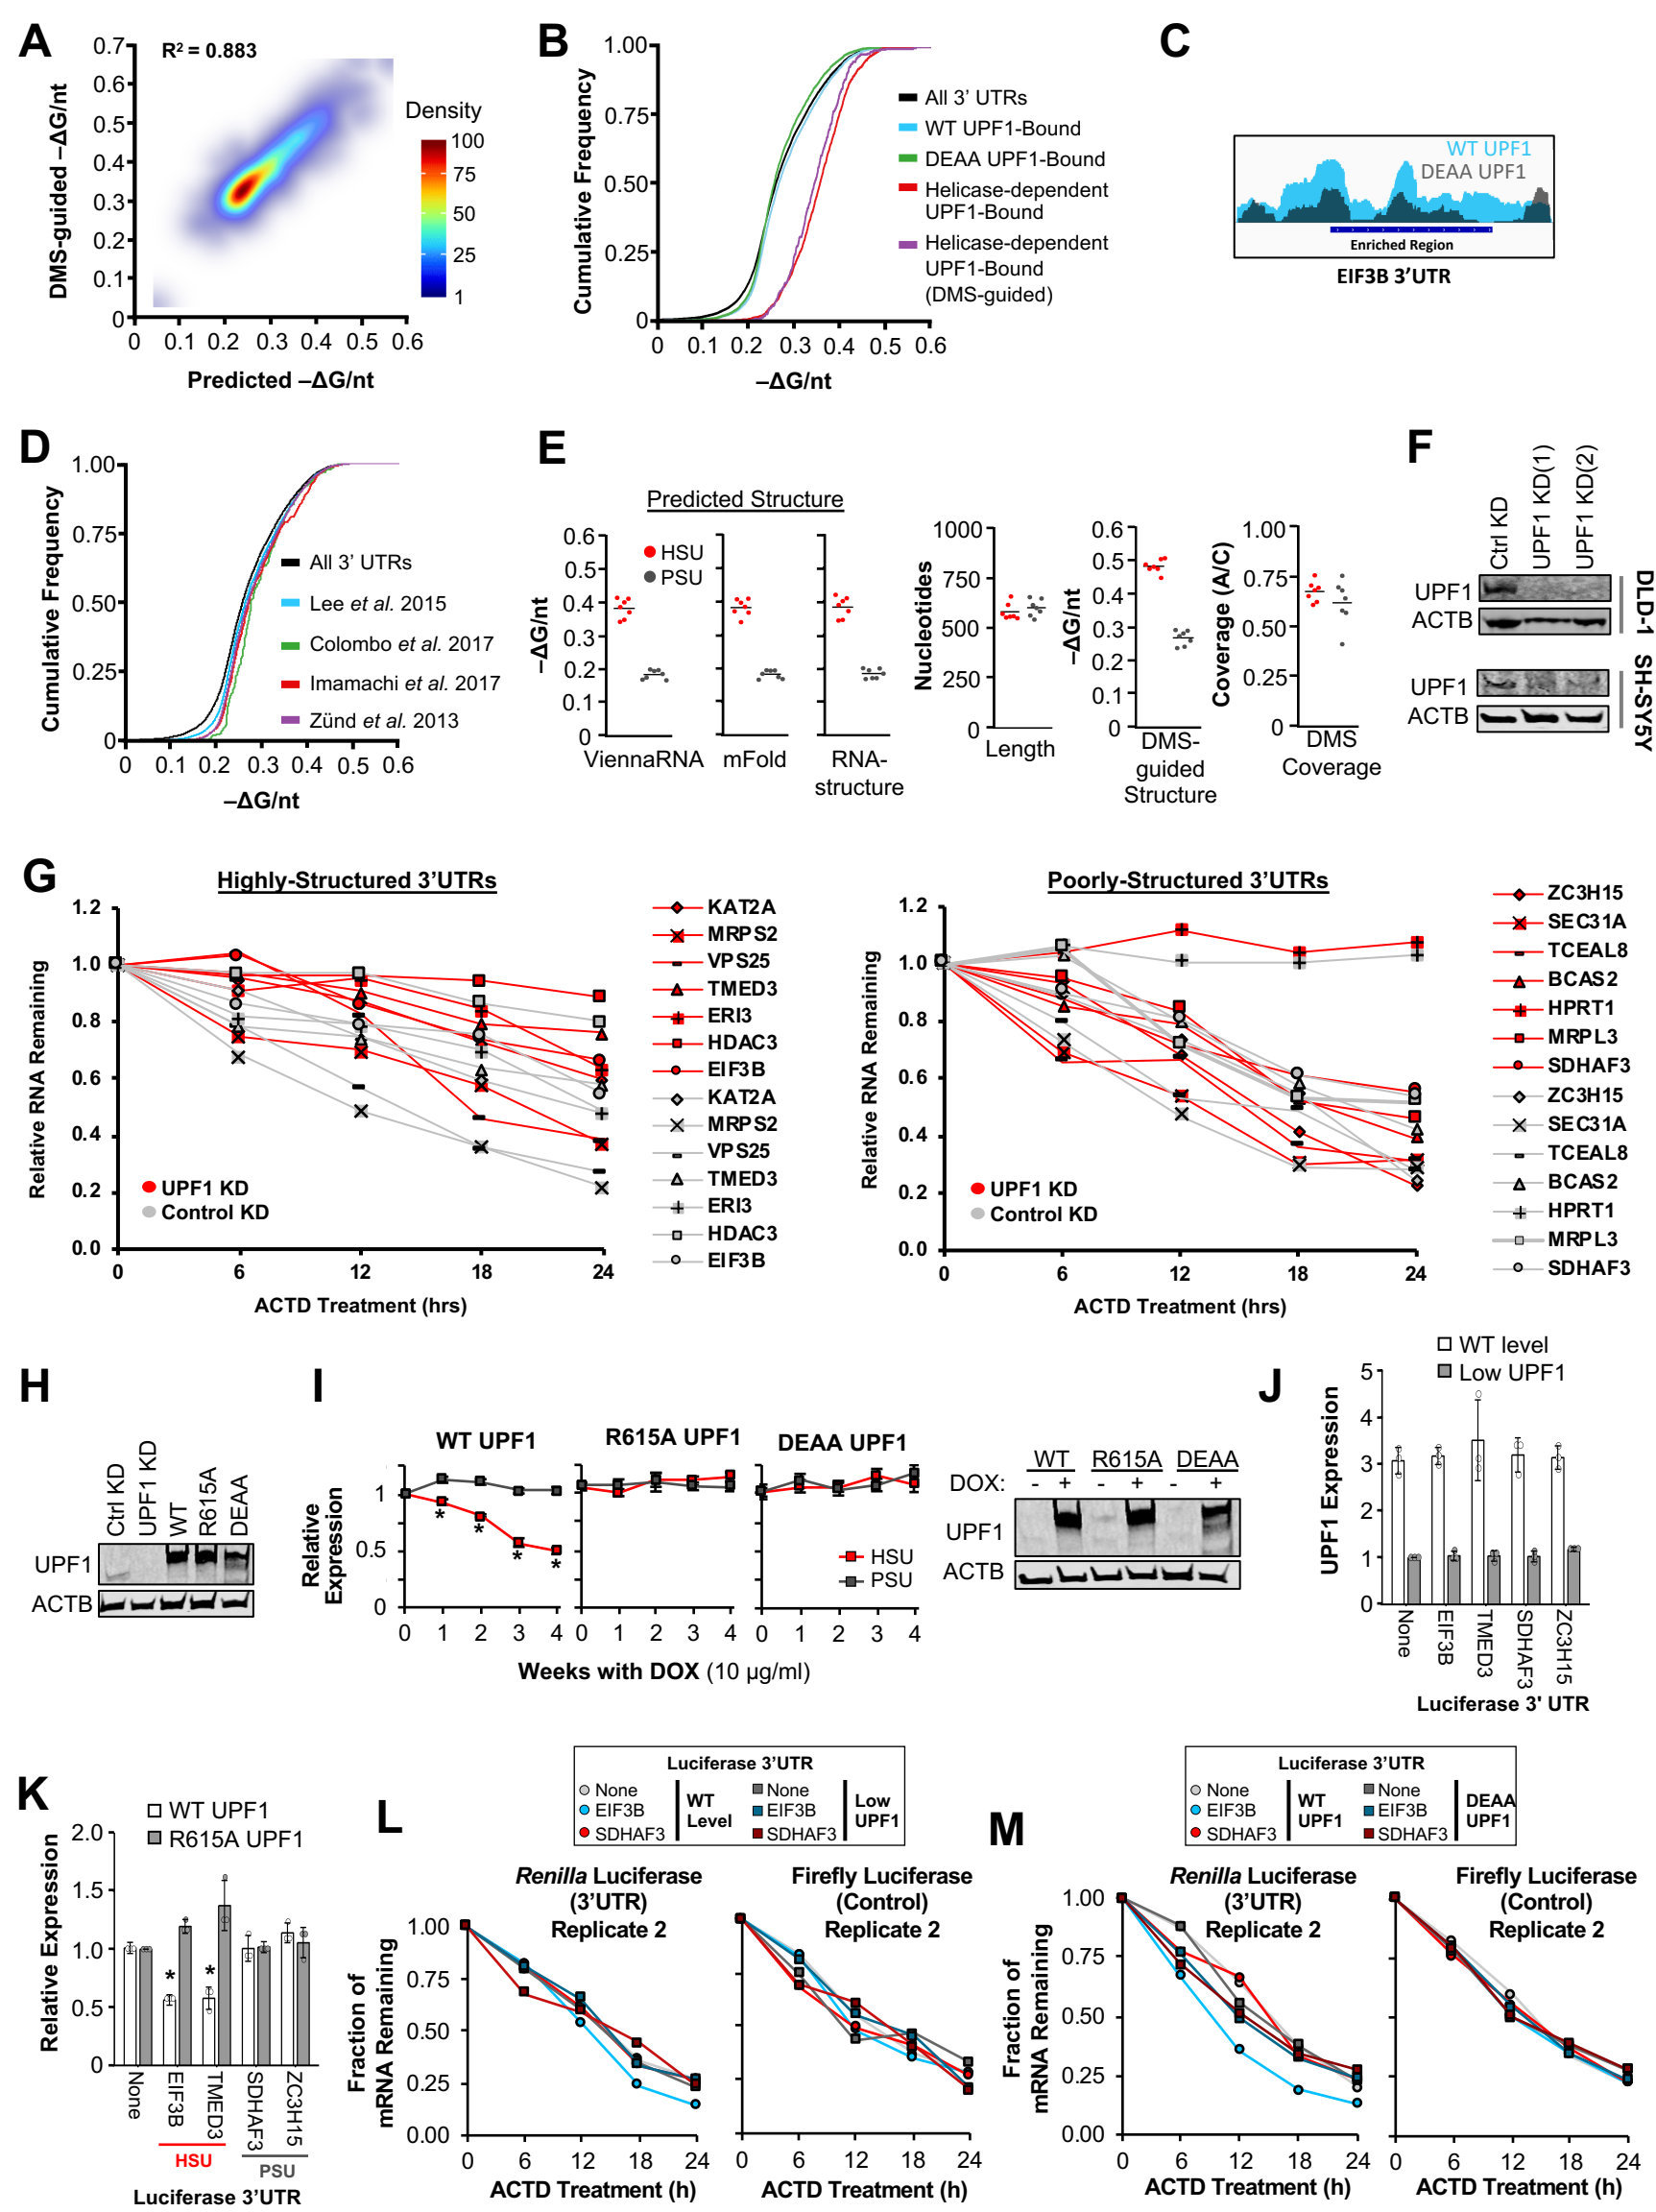

**Figure S1 (continued from last page): Helicase-dependent UPF1 regulates mRNAs with highly-structured 3'UTRs, Related to Figure 1. (A)** Positive correlation with the coefficient of determination ( $R^2$ ) calculated between predicted and DMS-guided (Zubradt et al., 2017) overall structure ( $n = 1,383$ ; Table S2). **(B)** The cumulative distribution function of  $-\Delta G/\text{nt}$  was calculated for all ( $n = 47,760$ ), WT UPF1-bound ( $n = 24,110$ ), UPF1 mutant DEAA-bound ( $n = 23,570$ ), helicase-dependent UPF1-bound ( $n = 3,036$ ), and helicase-dependent UPF1-bound with DMS-guided coverage ( $n = 333$ ) 3'UTRs (Table S1 and S2). **(C)** Integrative Genomics Viewer (Robinson et al., 2011) tracks to illustrate helicase-dependent UPF1-bound enriched region of UPF1 CLIP-seq reads for the EIF3B 3'UTR. **(D)** Cumulative distribution function of  $-\Delta G/\text{nt}$  for all 3'UTRs and WT UPF1-bound 3'UTRs from 4 separate studies (Colombo et al., 2017; Imamachi et al., 2017; Lee et al., 2015; Zünd et al., 2013) ( $n = 24,110, 1,460, 7,700,$  and  $20,138$  respectively; Table S1). **(E)** Candidate transcripts were chosen and analyzed for the predicted overall structure (Bellaousov et al., 2013; Lorenz et al., 2011; Zuker, 2003), length, DMS-guided structure, and DMS coverage. **(F)** Western blot analysis of UPF1 knockdown (KD) DLD-1 and SH-SY5Y cells from Figure 1C. **(G)** Degradation of individual candidate mRNAs for the first biological replicate of the 24 h ACTD experiment in Figure 1D. **(H)** Western blot analyses of UPF1 KD cells reintroduced with UPF1 GFP-tagged constructs from Figure 1E. **(I)** Average expression of candidate mRNAs during a UPF1-induction time course. UPF1 KD DLD-1 cells were stably integrated with a DOX-inducible GFP construct using the Flp-In T-Rex system. WT, R615A, and DEAA UPF1-expressing cells were treated with DOX ( $10 \mu\text{g}/\text{ml}$ ) to induce expression at week 0, and cells were passaged every 3-4 days. RNA expression was analyzed every week, and each data point represents the average of 7 candidate mRNAs analyzed by RT-qPCR in triplicate normalized to week 0. Western blot analyses were analyzed following treatment with or without DOX ( $10 \mu\text{g}/\text{ml}$ ) for 48 hours. **(J)** RNA expression of UPF1 from DOX-inducible luciferase experiments from Figure 1F. **(K)** Analysis of *Renilla* luciferase with candidate 3'UTRs in DLD-1 cells that overexpress WT or R615A UPF1 as in Figure 1F. **(L-M)** Second replicates of *Renilla* and Firefly Luciferase RNA half-lives for **(L)** WT compared to low levels of WT UPF1 from Figure 1G and **(M)** WT compared to DEAA UPF1 from Figure 1H. Significant differences ( $p$ -value  $<0.05$ ) were determined by Student's t-tests and denoted with \* in panels I and K. Statistics of all RT-qPCR data is documented in Table S5.

**A**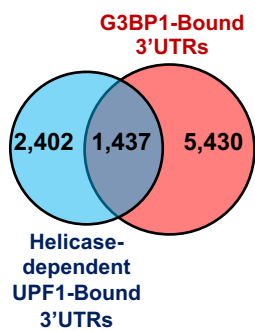**B**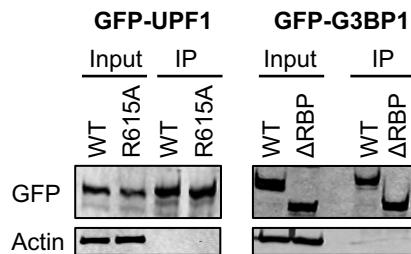**C**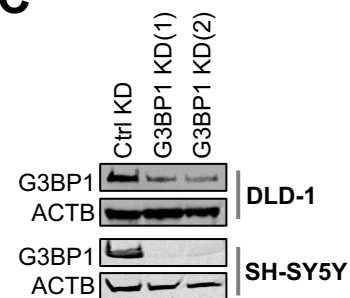**D**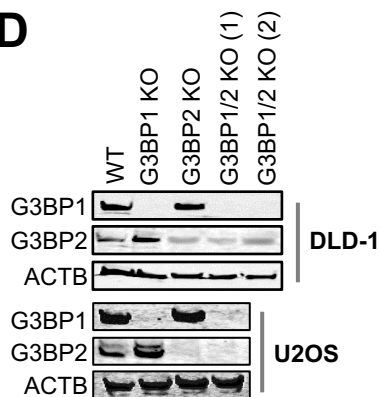**E**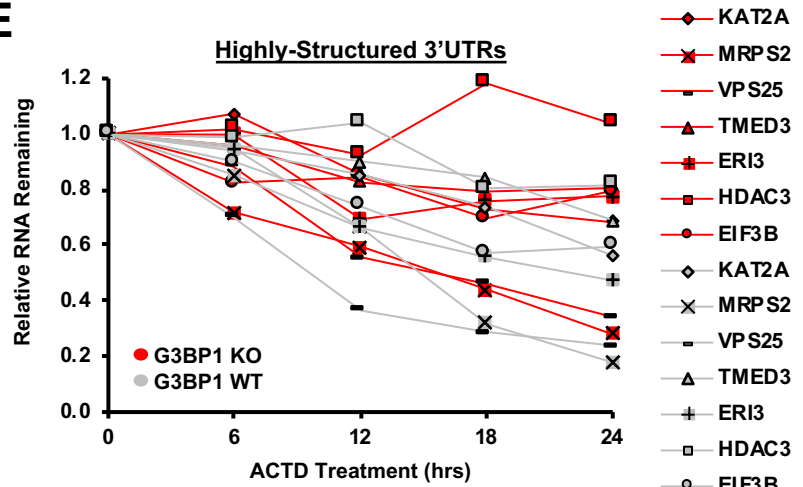**F**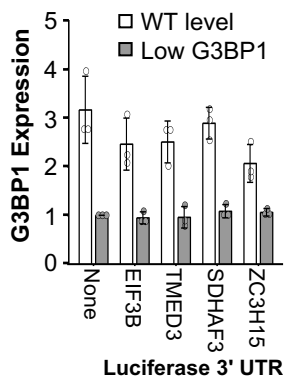**G**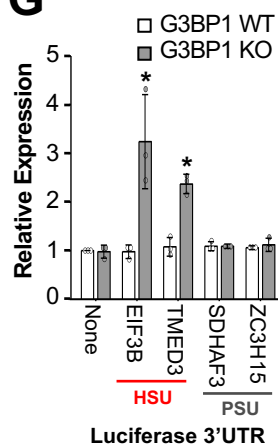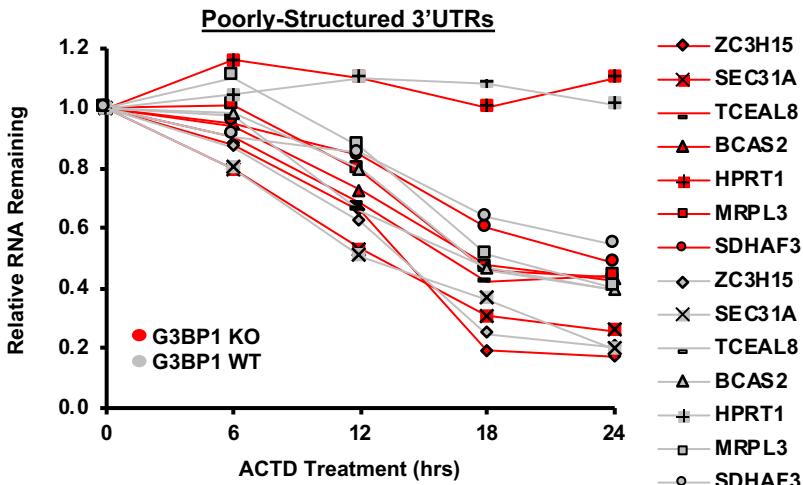**H**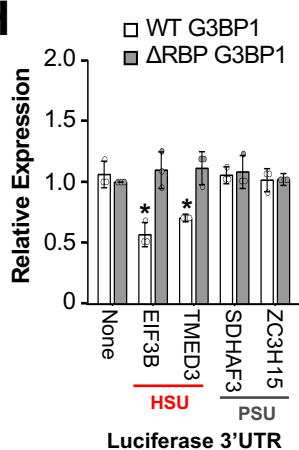**I**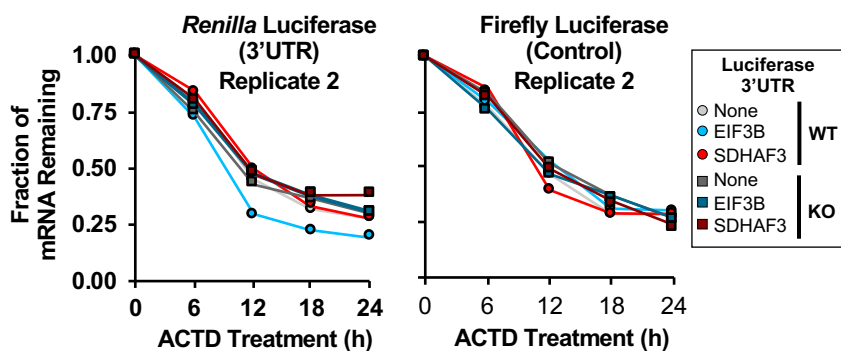**J**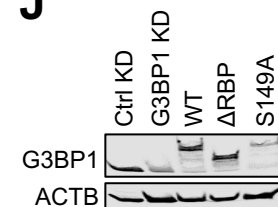**K**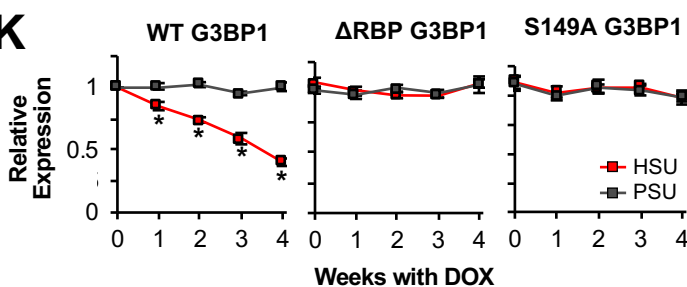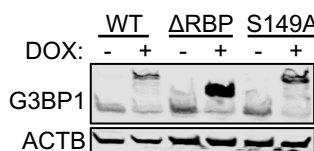**L**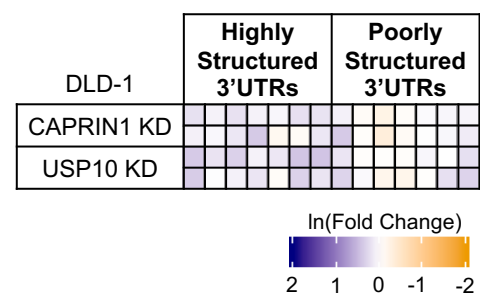

**Figure S2 (continued from last page): G3BP1 regulates mRNAs with highly-structured 3'UTRs, Related to Figure 2.** **(A)** Venn diagram illustrating the overlap of 3'UTRs bound by helicase-dependent UPF1 and G3BP1 (Table S1). **(B)** Analysis of RNA immunoprecipitation of GFP-tagged UPF1 and G3BP1. Western blot confirmation of RNA immunoprecipitation and RT-qPCR analysis of a biological replicate of RNA immunoprecipitation as performed in Figure 2B. **(C)** Western blot analysis of G3BP1 KD cell lines from Figure 2C. **(D)** Western blot analysis of G3BP1 and G3BP2 KO cell lines from Figure 2D. **(E)** Degradation of individual candidate mRNAs for the first biological replicate of actinomycin D experiments from Figure 2E. **(F)** RNA expression of G3BP1 mRNA from DOX-inducible luciferase experiments in Figure 2F. **(G)** Analyses of *Renilla* luciferase RNA expression in G3BP1 WT and KO DLD-1 cells as in Figure 2F. **(H)** Analyses of *Renilla* luciferase expression with candidate 3'UTRs in DLD-1 cells that overexpress G3BP1 WT or  $\Delta$ RBP mutant. **(I)** The second replicate for the change in luciferase RNA half-lives from actinomycin D-treated G3BP1 WT and KO cells as in Figure 2G. All *Renilla* and firefly luciferase expression data in Table S5. **(J)** Western blot analyses of G3BP1 KD cells reintroduced with G3BP1 GFP-tagged constructs from Figure 2H. **(K)** Average expression of candidate mRNAs during a G3BP1-induction time course. G3BP1 KD DLD-1 cells were stably integrated with DOX-inducible WT,  $\Delta$ RBP, and S149A G3BP1 and analyzed for RNA and protein expression as in Figure S1I. **(L)** DLD-1 cells stably expressing shRNAs targeting G3BP1-associated genes were analyzed for changes in gene expression as in Figure 1C. Significant differences (p-value <0.05) were determined by Student's t-tests and denoted with \* in panels B, G, H and K. Statistics of all RT-qPCR data is documented in Table S5.

**A**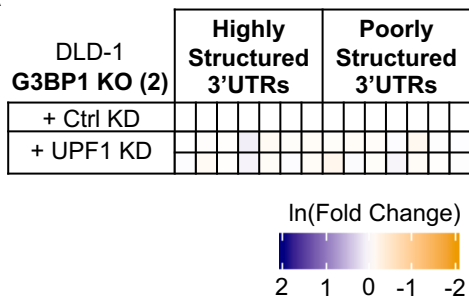**B**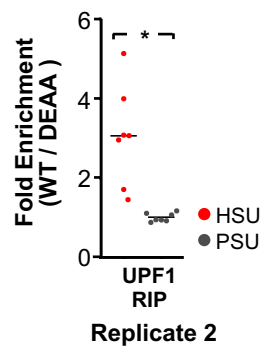**C**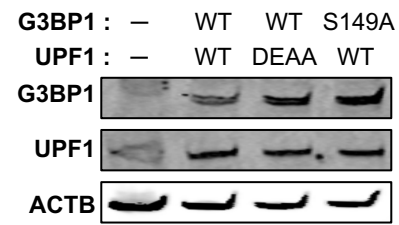**D**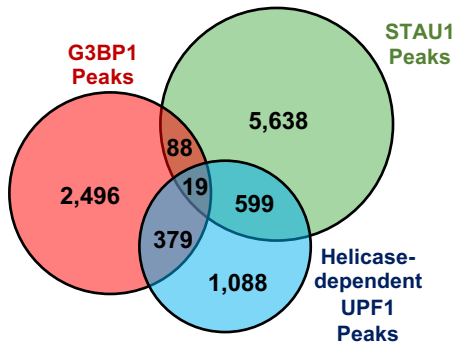**E**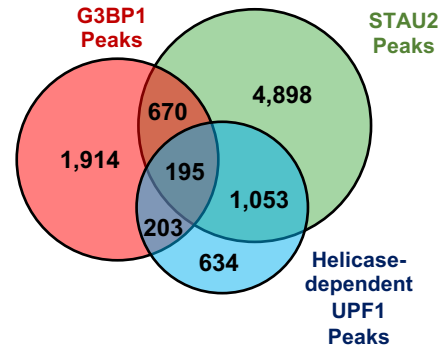

**Figure S3: UPF1 and G3BP1 regulate transcripts with highly-structured 3'UTRs through a mechanism independent of other UPF1-associated pathways, Related to Figure 3.** (A) Analysis of G3BP1 KO DLD-1 cells using a second gRNA with the additional stable control (Ctrl) KD and UPF1 KD as in Figure 3A. (B) The second RT-qPCR replicate of the pulldown of WT and DEAA UPF1 from Figure 3B. (C) Analysis of UPF1 and G3BP1 protein expression in transfected G3BP1 KO + UPF1 KD cells from Figure 3C. (D-E) Venn diagram illustrating the overlap of 3'UTR CLIP-seq peaks for helicase-dependent UPF1 (Lee et al. 2015) and G3BP1 (Dunham et al. 2012) with (D) STAU1 (Sugimoto et al. 2015) or (E) STAU2 (Dunham et al. 2012). Significant differences (p-value < 0.05) were determined by Student's t-tests and denoted with \* in panel B. Statistics of all RT-qPCR data is documented in Table S5

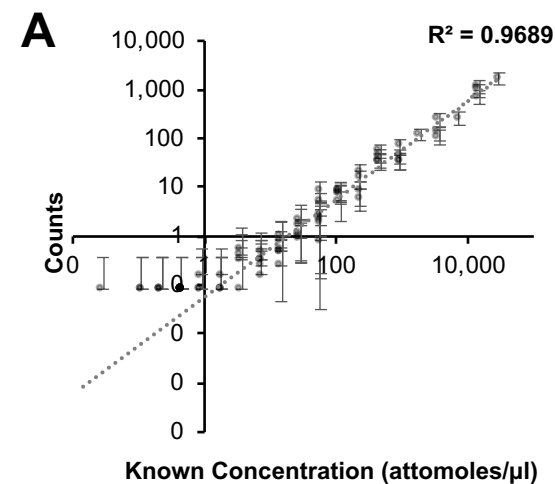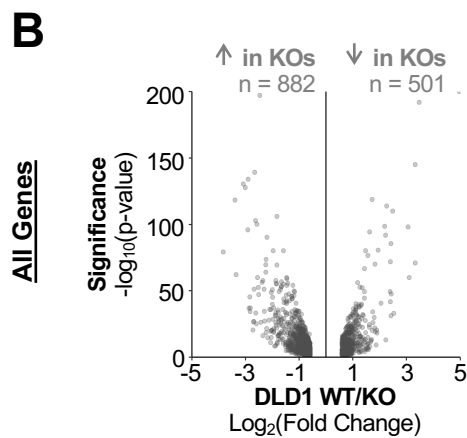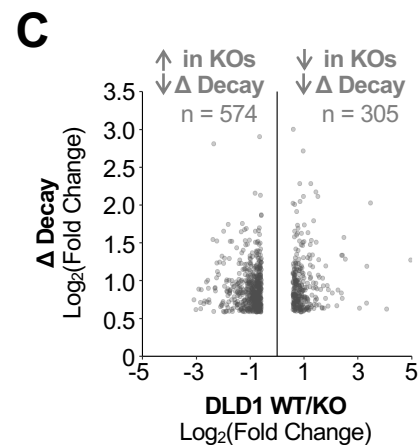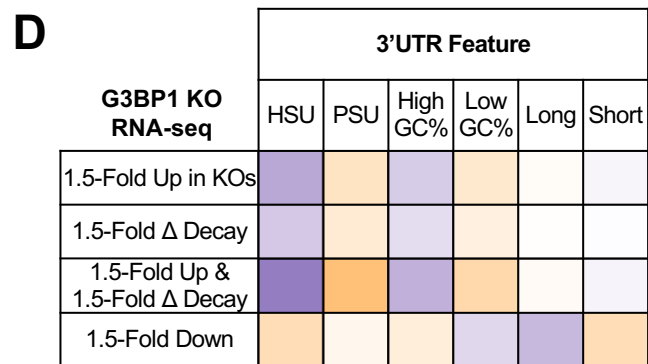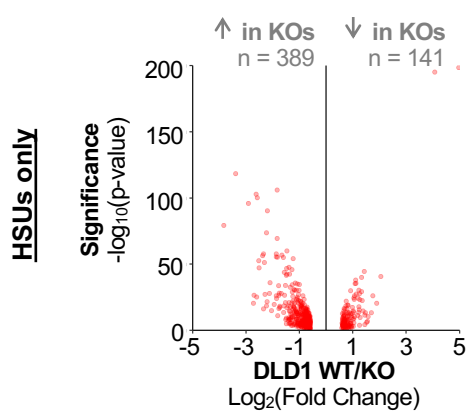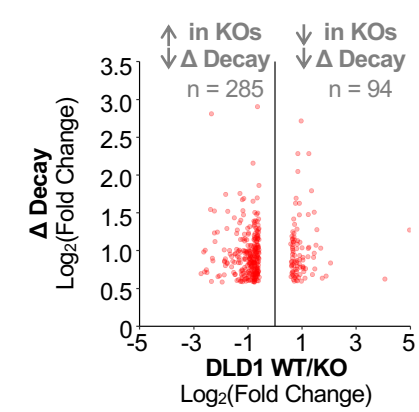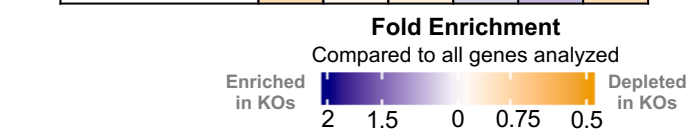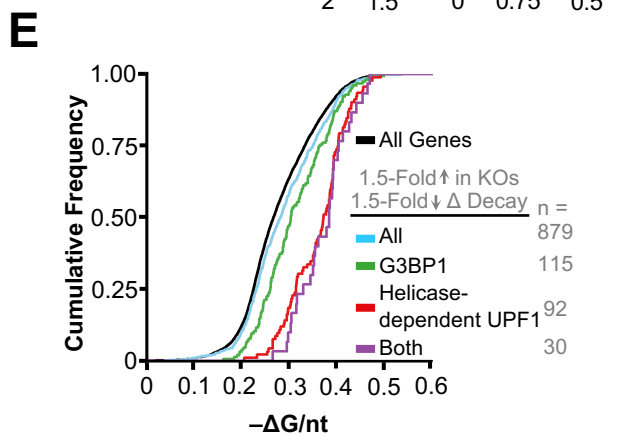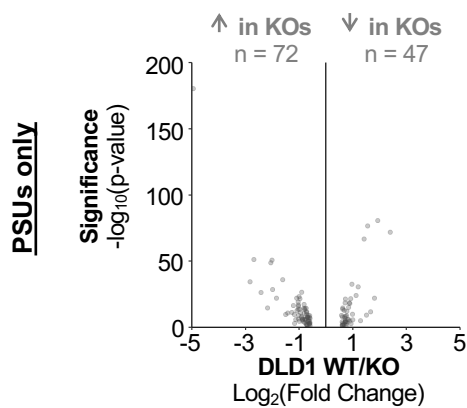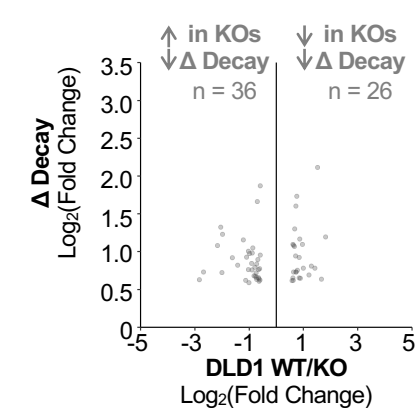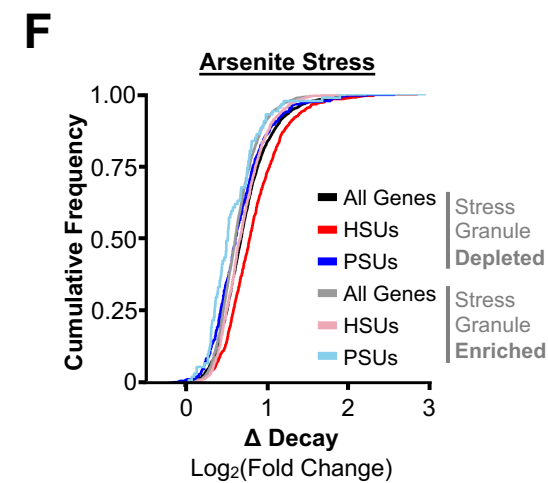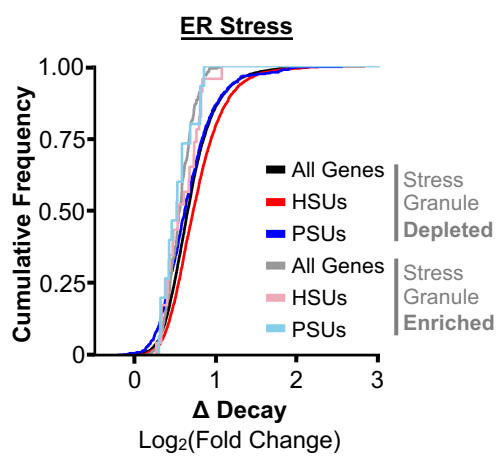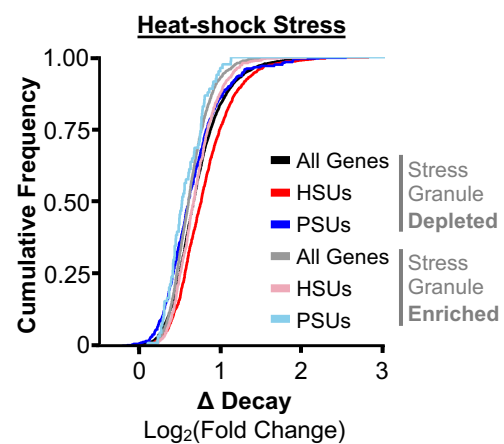

**Figure S4 (continued from last page): G3BP1 preferentially regulates the expression and decay of genes with HSUs globally, Related to Figure 4. (A)** Correlation of all ERCC spike-in known concentrations and RNA-seq gene counts with the coefficient of determination ( $R^2$ ) calculated. **(B)** Volcano plots depicting the fold change and p-values for the differentially expressed genes in G3BP1 WT vs KO cells for all genes, genes with HSUs, and genes with PSUs. **(C)** Volcano plots depicting the change in steady-state levels and decay for the differentially expressed genes in G3BP1 WT vs KO cells for all genes, genes with HSUs, and genes with PSUs. **(D)** Analysis of the enrichment of genes that were differentially expressed and/or decreased decay (1.5-fold) based on different 3'UTR features as in Figure 4B. Corresponding statistics are detailed in Table S3. **(E)** Cumulative distribution function of the average  $-\Delta G/\text{nt}$  for all genes detected, and for all genes, G3BP1-bound, helicase-dependent UPF1-bound, and both-bound genes up-regulated (>1.5 fold) with reduced decay (>1.5 fold) in G3BP1 KO cells. **(F)** Cumulative distribution function of the change in decay in G3BP1 KO cells for genes enriched or depleted in stress granules induced by arsenite stress, ER stress, or heat-shock stress (Namkoong et al., 2018) as in Figure 4E. HSUs with 2-fold decrease in decay were significantly enriched in the stress granule depleted genes (p-value <0.0001 for all three stress conditions).



**A**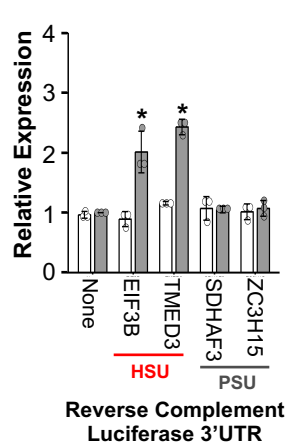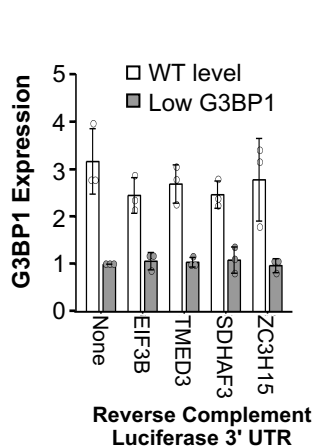**B**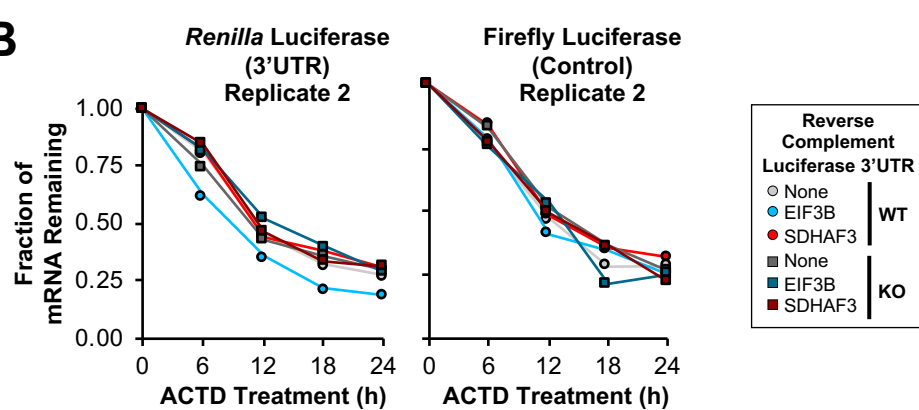**C**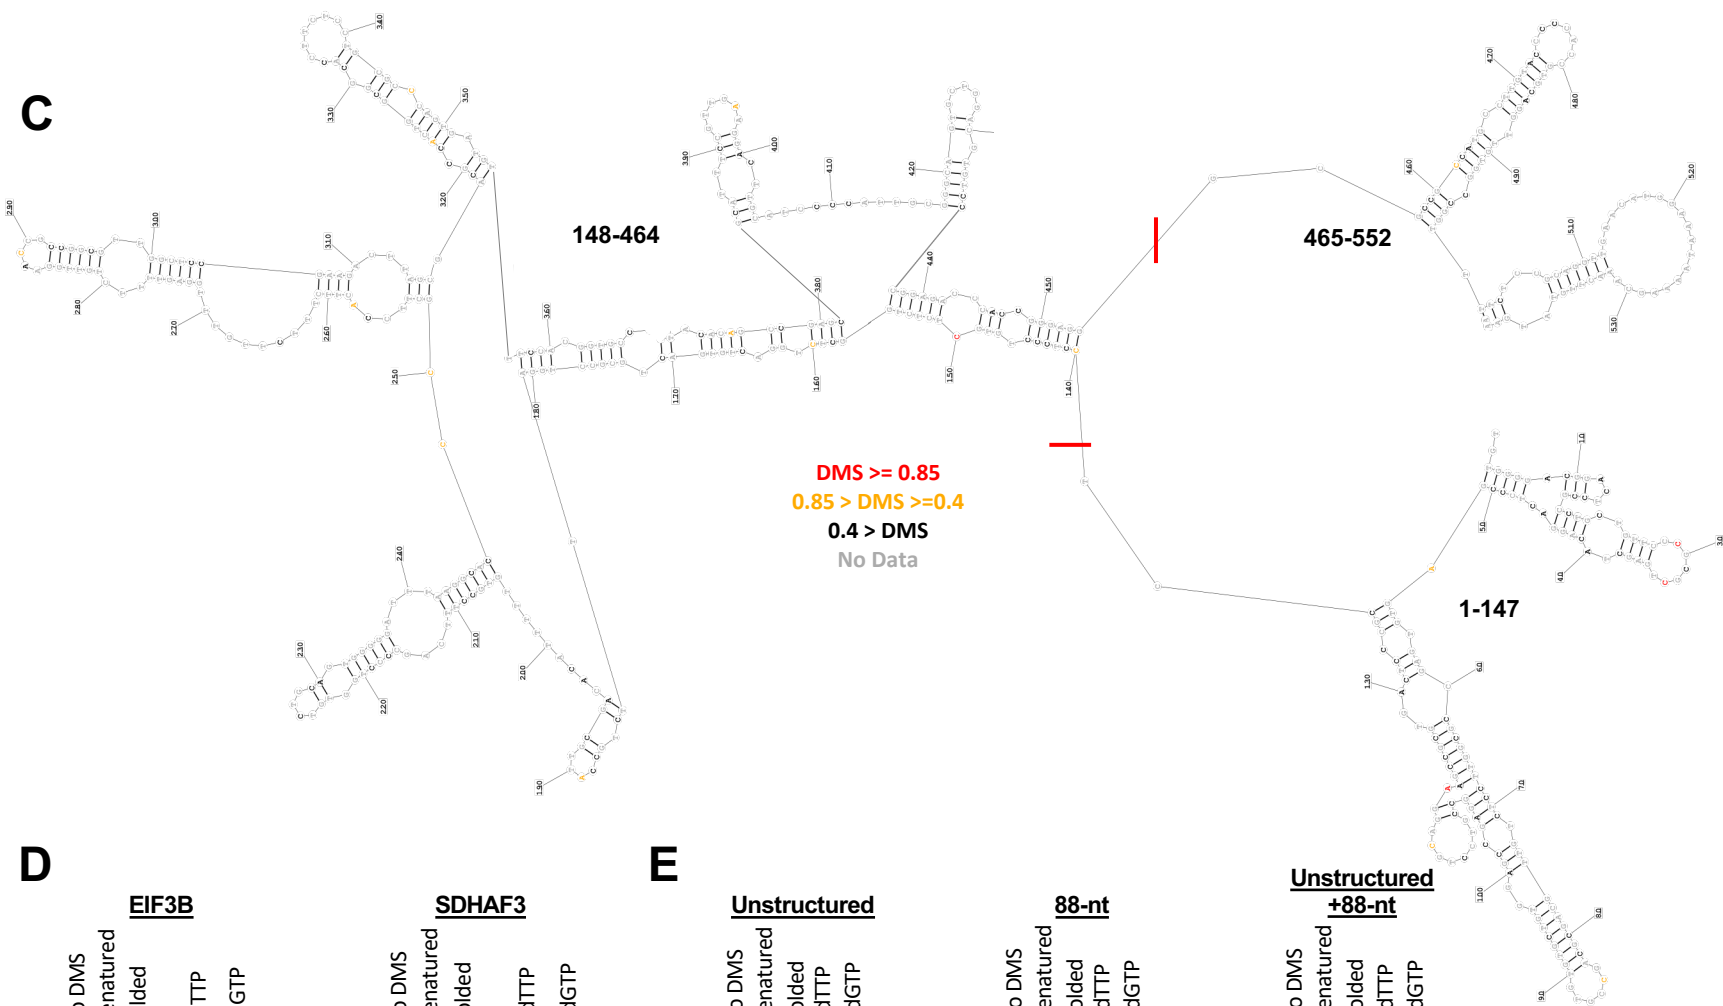**D**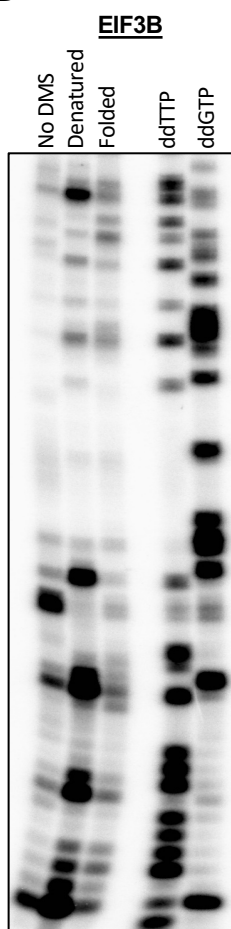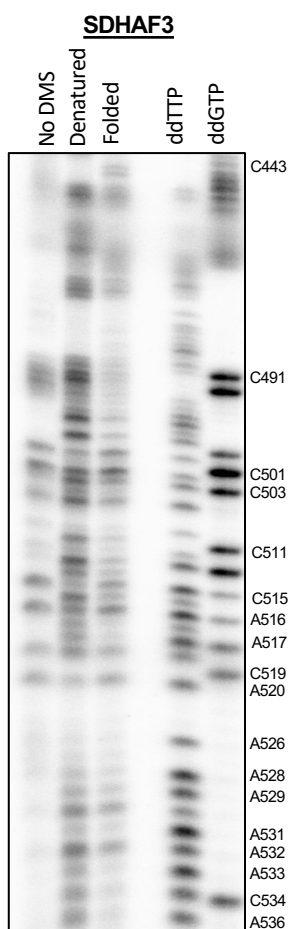**E**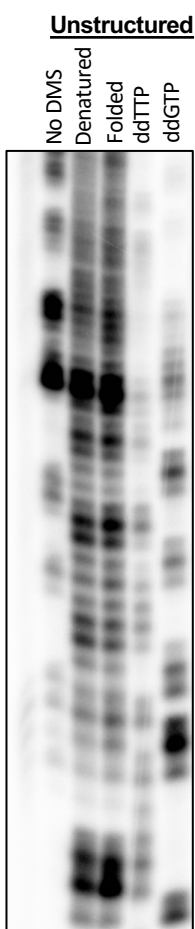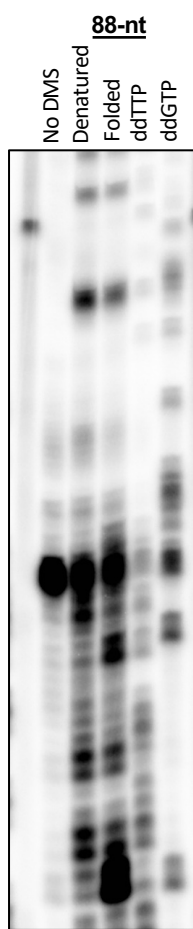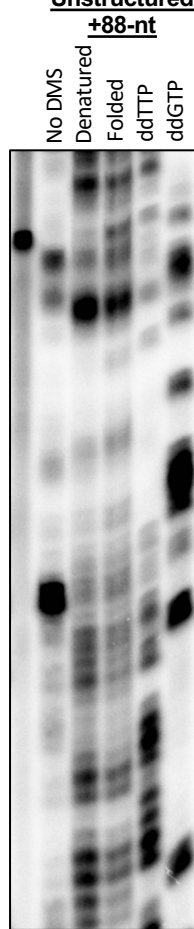



**Figure S5 (continued from last page): SRD regulation is dependent on the overall 3'UTR structure, Related to Figure 5. (A)** Analysis of G3BP1-mediated regulation of the reverse complements of 3'UTRs in G3BP1 DOX-inducible cells as in Figure 5B. Significant differences (p-value <0.05) were determined by Student's t-tests and denoted with \*. **(B)** The second replicate for the change in reverse complement luciferase RNA half-lives from actinomycin D-treated G3BP1 WT and KO cells as in Figure 5C. **(C)** DMS-MaPseq data was used to guide the folding of the EIF3B 3'UTR. Red lines indicate the location in which EIF3B was divided into thirds for fragment analyses in Figure 3D. **(D-E)** DMS analyses on *in vitro* transcribed 3'UTRs in denatured and folded states for **(D)** EIF3B (HSU), SDHAF3 (PSU), **(E)** artificial unstructured, 88-nt EIF3B fragment, and 88-nt fragment with the unstructured sequence inserted upstream 3'UTRs. Statistics of all RT-qPCR data is documented in Table S5.

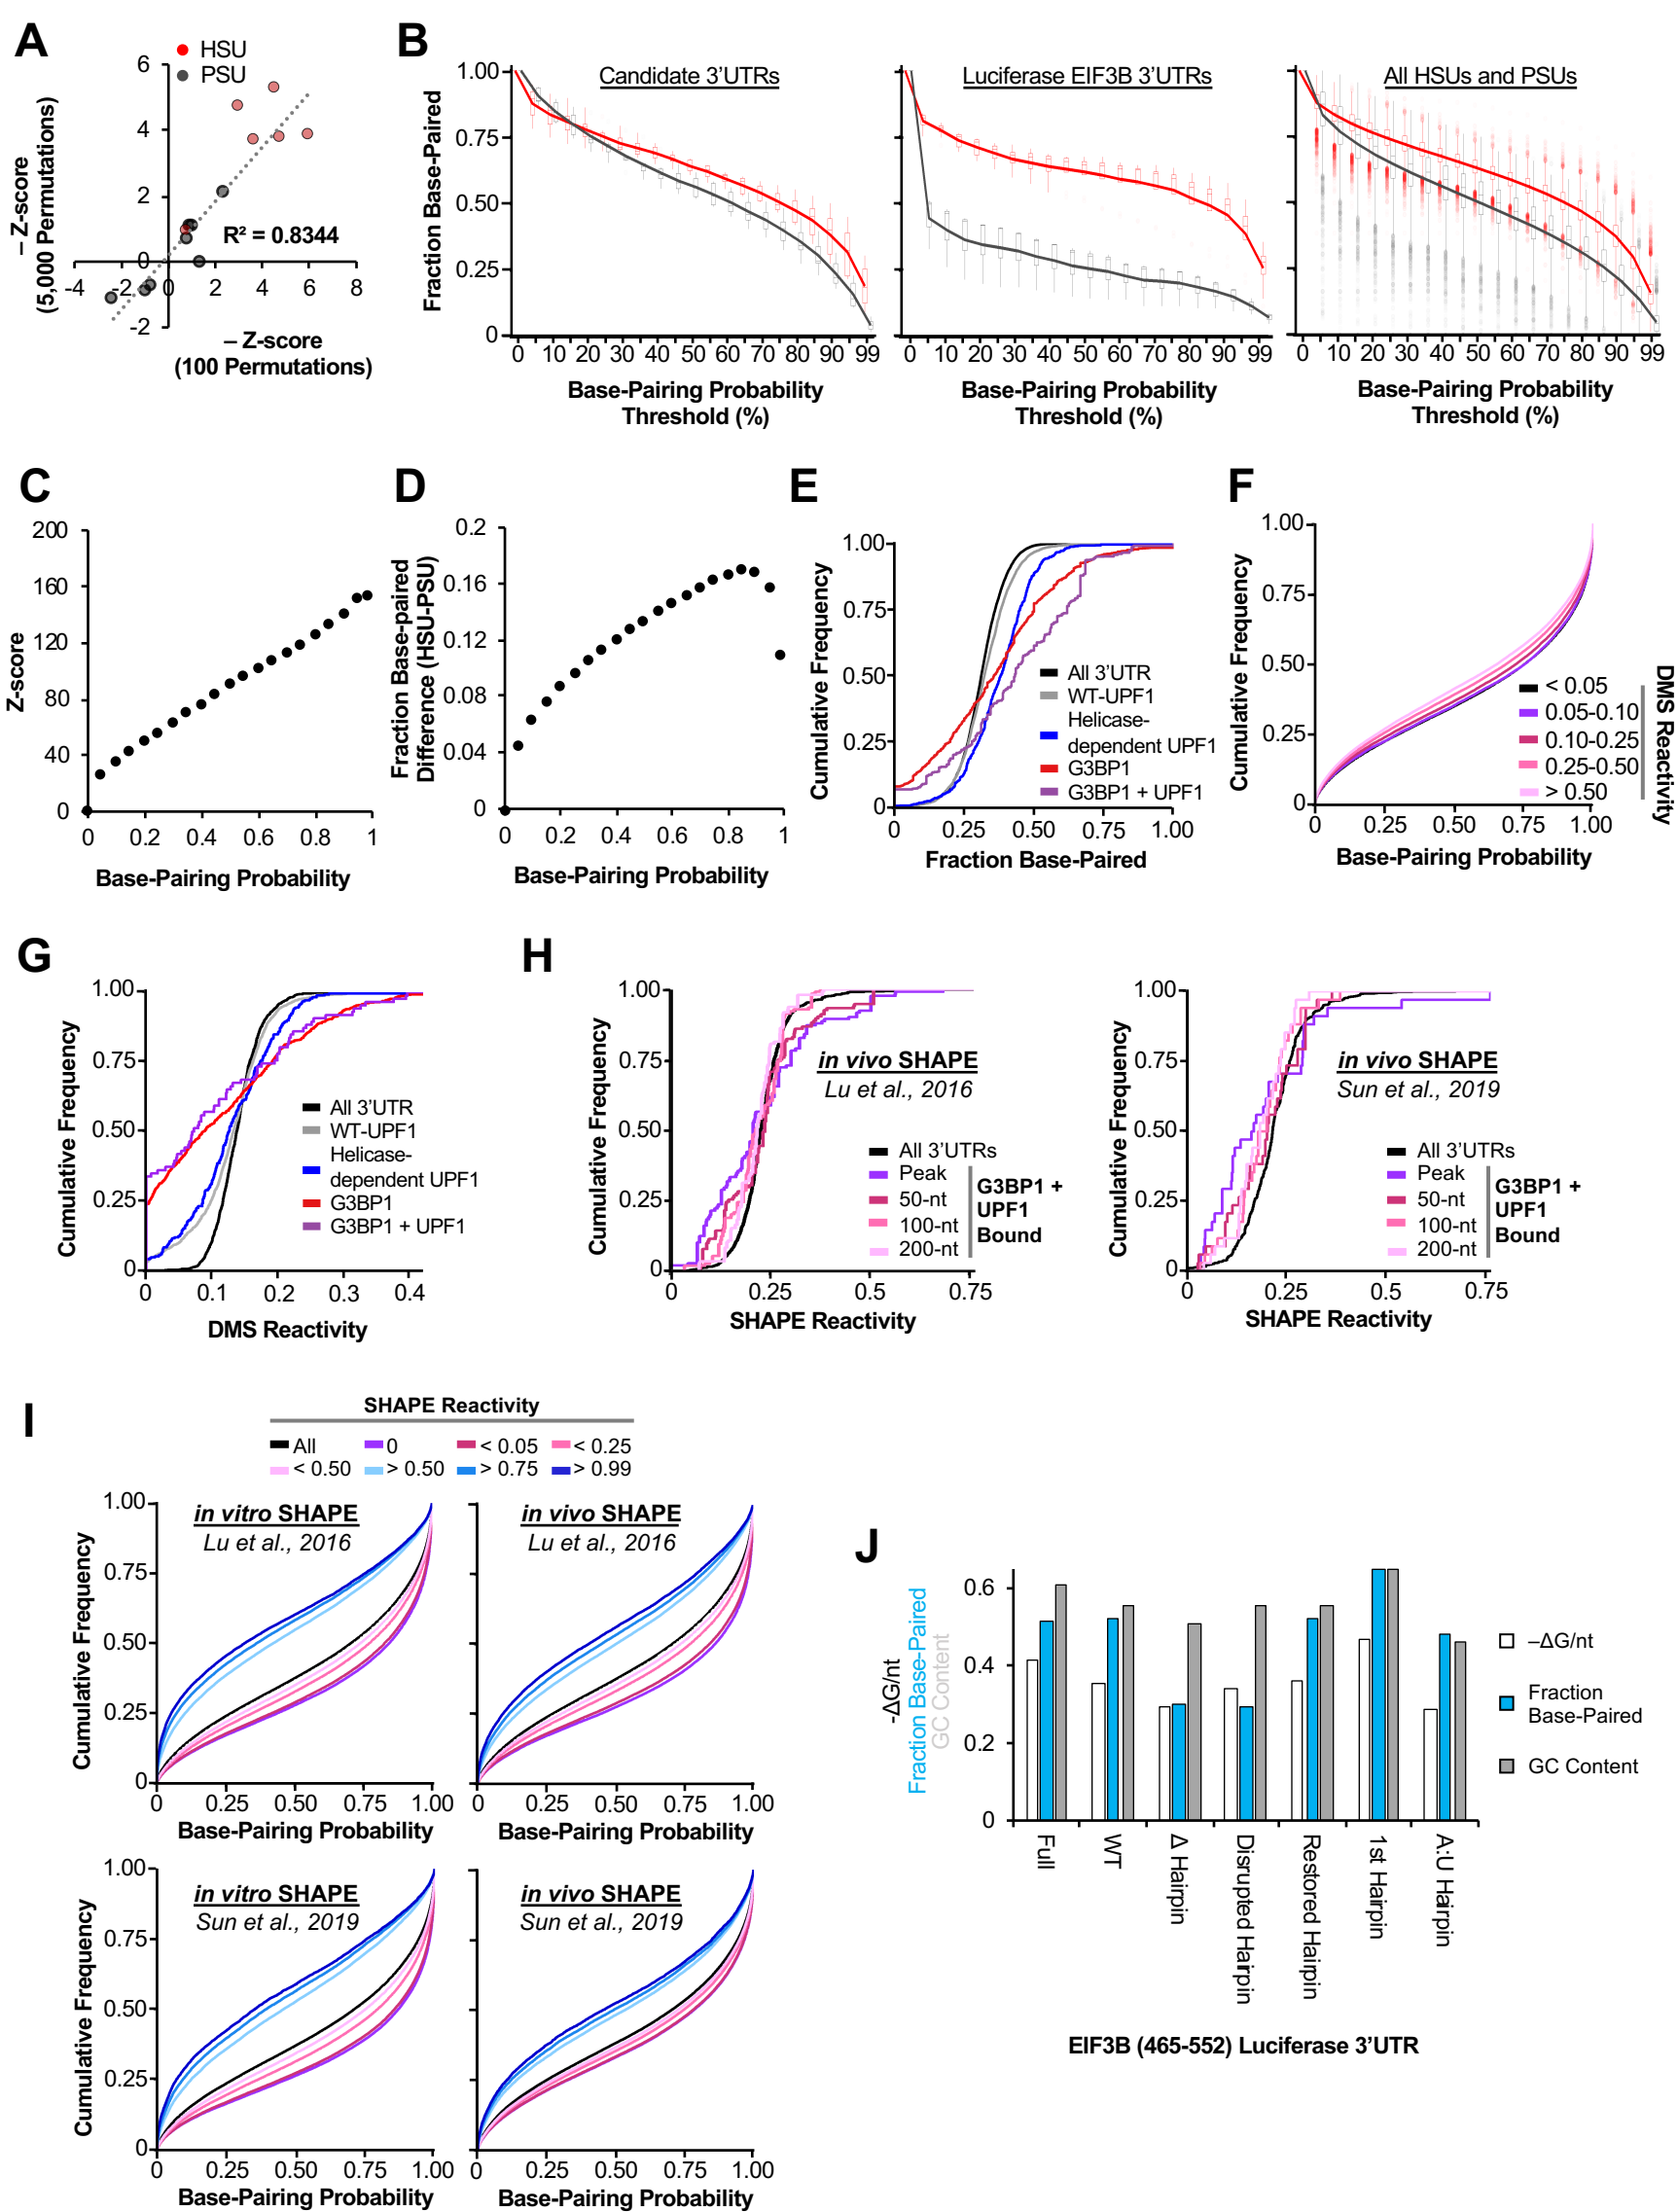

**Figure S6 (continued from last page): SRD regulates highly-base paired structures, Related to Figure 6.** (A) Correlation of the z-scores derived by comparing the  $-\Delta G/\text{nt}$  of the actual 3'UTR to the  $-\Delta G/\text{nt}$  for 100 permutations and 5,000 permutations of the 14 candidate 3'UTRs. (B) Boxplots depict the fraction of the entire 3'UTR base-paired with different probability thresholds determined by the partition function in ViennaRNA (Lorenz et al., 2011) for HSUs and PSUs of candidate 3'UTRs, luciferase EIF3B 3'UTRs from Figure 5D-E, and all 3'UTRs. The line plot represents the mean percent of the 3'UTRs being base-paired for each group. (C) Z-score analysis of the difference in base-pairing probability with different thresholds between all HSUs and PSUs. Larger Z-scores represent a more significant difference in the fraction of the 3'UTR base-paired between HSUs and PSUs. (D) The difference in base-pairing between HSUs and PSUs with different base-pairing thresholds. (E) Cumulative distribution function of the fraction of base-paired nucleotides ( $\geq 90\%$  probability) for all 3'UTRs, WT UPF1-bound, helicase-dependent UPF1-bound, G3BP1-bound, and G3BP1 + UPF1-bound regions. (F) Cumulative distribution function of the predicted base-pairing probability for individual 3'UTR nucleotides with increasing DMS reactivity cutoffs. (G) Cumulative distribution function of the DMS reactivity for all 3'UTRs, WT UPF1-bound, helicase-dependent UPF1-bound, G3BP1-bound, and G3BP1 + UPF1-bound regions. (H) Cumulative distribution function of SHAPE reactivity from Lu et al. (2016; Top panel) and Sun et al. (2019; Bottom panel) for G3BP1 + UPF1-bound regions (peak and its surrounding 0, 100, and 200 nts with the peak as the mid-point). (I) Cumulative distribution function of the predicted base-pairing probability for individual 3'UTR nucleotides with different in vitro and in vivo SHAPE reactivity cutoffs from Lu et al. (2016; Top panels) and Sun et al. (2019; Bottom panels). (J) Analysis of the overall structure, fraction base-paired ( $>90\%$ ), and GC content for the resulting mutations of the 88-nt EIF3B fragment from Figure 6H.

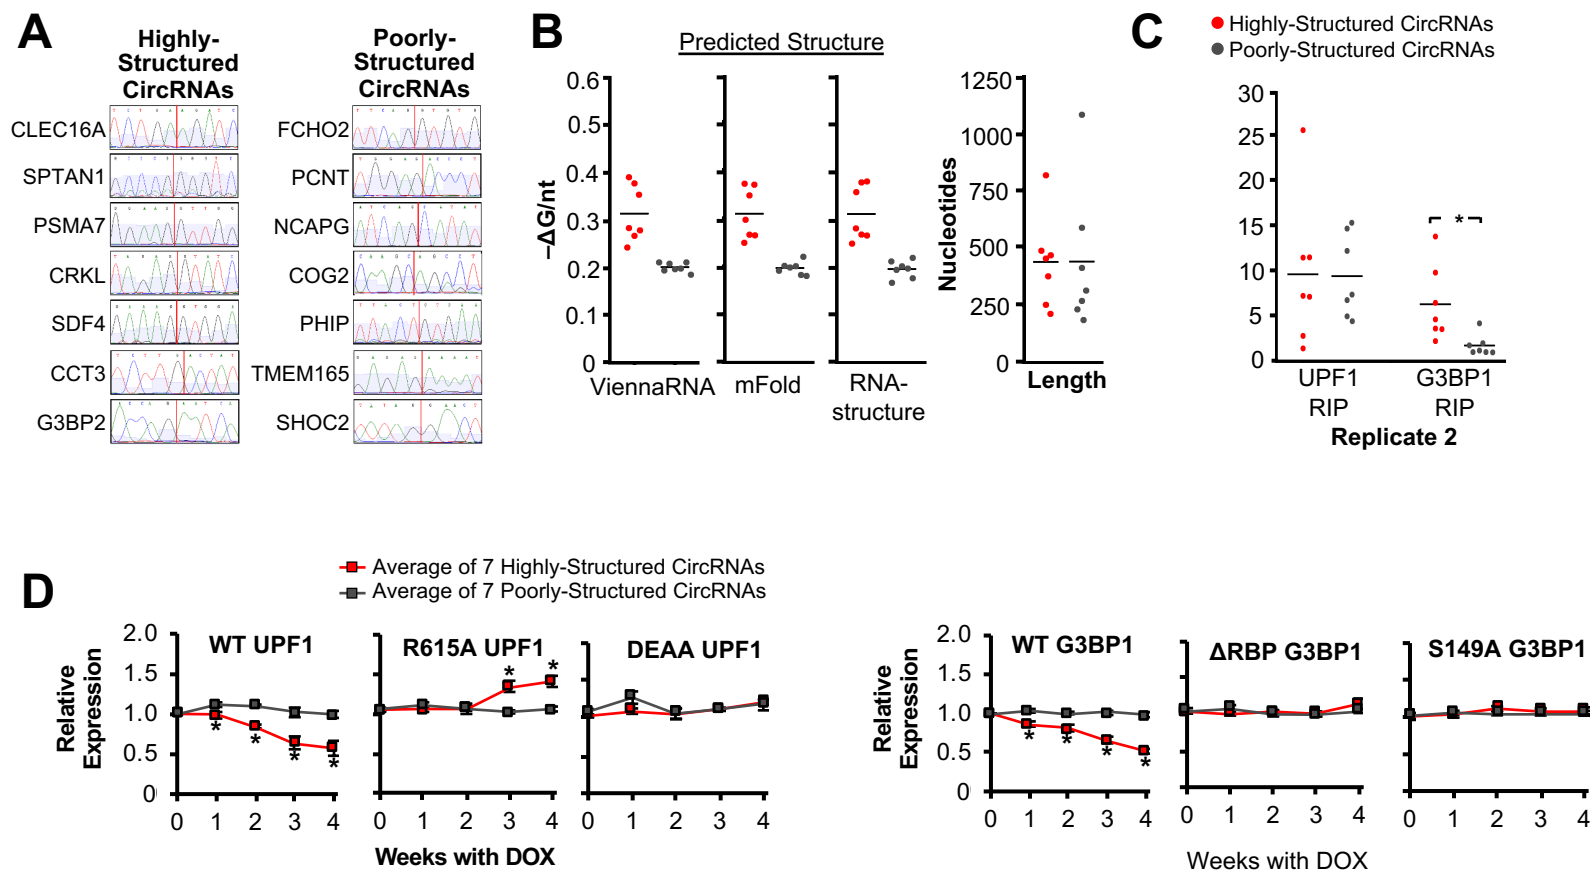

**Figure S7: UPF1 and G3BP1 differentially regulate circRNAs, Related to Figure 7. (A)** Validation of circRNA RT-qPCR products by Sanger sequencing for 7 highly-structured and 7 poorly-structured candidate circRNAs. 10 nucleotides surrounding the circRNA back-splice junction was shown to confirm the identity of the RT-qPCR products. **(B)** Candidate circRNAs were analyzed for predicted overall structure and length. Three folding programs were used to determine the overall structure (Bellaousov et al., 2013; Lorenz et al., 2011; Zuker, 2003). **(C)** The RNA immunoprecipitations performed in Figure 2B and S2B were analyzed for candidate circRNA association. **(D)** Average expression of candidate circRNAs during a UPF1 and G3BP1 DOX-induction time course as in Figure S1I and S2K. Significant differences ( $p$ -value  $<0.05$ ) were determined by Student's t-tests and denoted with \* in panels C and D. Statistics of all RT-qPCR data is documented in Table S5.
